# Supplementary material for: CTLA-4 blockade boosts the expansion of tumor-reactive CD8+ tumor-infiltrating lymphocytes in ovarian cancer
Source: PubMed Central journal article supplement (PMC7054305; doi:10.1038/s41598-020-60738-4), 2020-03-03
Supplement: 41598_2020_60738_MOESM1_ESM.pdf [file 41598_2020_60738_MOESM1_ESM.pdf]

**CTLA-4 blockade boosts the expansion of tumor-reactive CD8<sup>+</sup> tumor-infiltrating lymphocytes  
in ovarian cancer**

**Authors:**

Christina Friese<sup>1</sup>, Katja Harbst<sup>2</sup>, Troels Holz Borch<sup>1</sup>, Marie Christine Wulff Westergaard<sup>1</sup>, Magnus Pedersen<sup>1</sup>, Anders Kverneland<sup>1</sup>, Göran Jönsson<sup>2</sup>, Marco Donia<sup>1</sup>, Inge Marie Svane\*<sup>1</sup>, Özcan Met\*<sup>1,3</sup>

**Affiliations:**

<sup>1</sup>Center for Cancer Immune Therapy (CCIT), Department of Oncology, Herlev Hospital, Herlev, Denmark.

<sup>2</sup>Department of Clinical Sciences Lund, Division of Oncology and Pathology, Lund University, Lund, Sweden

<sup>3</sup>Department of Immunology and Microbiology, Faculty of Health and Medical Sciences, University of Copenhagen, Denmark.

**\*These authors share senior authorship**

**Corresponding Authors:**

Özcan Met, Email: ozcan.met@regionh.dk, phone: +4538689229, fax: +4538684153

and Inge Marie Svane, Email: inge.marie.svane@regionh.dk, phone: +4538689339, fax: +4538684153

**Supplementary Information**

**Supplementary Table S1. CD8<sup>+</sup> T cells in the initial and expanded TIL cultures.**

| Patient           | Before expansion |       | After expansion |       |       |       |
|-------------------|------------------|-------|-----------------|-------|-------|-------|
|                   | -                | +     | -/-             | -/+   | +/-   | +/+   |
| <b>α-CTLA-4</b>   |                  |       |                 |       |       |       |
| <b>GY1508.05</b>  | 18.7%            | 96.3% | 47.2%           | 45.7% | 97.5% | 97.0% |
| <b>GY1508.06</b>  | 25.4%            | 77.9% | 9.7%            | 9.5%  | 88.6% | 88.7% |
| <b>GY1508.07</b>  | 22.6%            | 78.1% | 2.0%            | 1.0%  | 19.3% | 17.3% |
| <b>GY1508.08</b>  | 2.9%             | 38.1% | 1.3%            | 3.2%  | 14.1% | 11.8% |
| <b>GY1508.09</b>  | 83.9%            | 77.0% | 58.2%           | 60.4% | 40.5% | 57.2% |
| <b>GY1508.10</b>  | 4.2%             | 5.5%  | 1.9%            | 0.8%  | 2.0%  | 3.2%  |
| <b>GY1508.11</b>  | 12.9%            | 43.4% | 4.9%            | 3.4%  | 53.5% | 56.2% |
| <b>EOC.TIL.27</b> | 0.3%             | 15.5% | 0.1%            | 0.1%  | 71.3% | 69.6% |
| <b>GY1721.01</b>  | 26.5%            | 28.2% | 23.9%           | 21.8% | 32.7% | 32.5% |
| <b>GY1721.02</b>  | 8.4%             | 22.7% | 12.8%           | 2.5%  | 0.9%  | 1.0%  |
| <b>GY1721.03</b>  | 63.7%            | 48.3% | 71.7%           | 68.8% | 43.3% | 43.8% |
| <b>GY1721.04</b>  | 14.5%            | 3.8%  | 32.2%           | 29.4% | 3.6%  | 3.8%  |
| <b>GY1721.05</b>  | 39.7%            | 41.8% | 57.7%           | 55.9% | 39.9% | 40.8% |
| <b>GY1721.07</b>  | 15.2%            | 0.0%  | 0.9%            | 0.5%  | 0.2%  | 0.0%  |

**Supplementary Table S2. CD4<sup>+</sup> T cells in the initial and expanded TIL cultures.**

| Patient           | Before expansion |       | After expansion |       |       |       |
|-------------------|------------------|-------|-----------------|-------|-------|-------|
|                   | -                | +     | -/-             | -/+   | +/-   | +/+   |
| <b>α-CTLA-4</b>   |                  |       |                 |       |       |       |
| <b>GY1508.05</b>  | 76.8%            | 1.3%  | 51.6%           | 53.1% | 1.9%  | 2.1%  |
| <b>GY1508.06</b>  | 71.5%            | 11.5% | 79.8%           | 86.5% | 8.7%  | 8.4%  |
| <b>GY1508.07</b>  | 72.9%            | 18.9% | 96.1%           | 97.5% | 77.5% | 79.3% |
| <b>GY1508.08</b>  | 72.3%            | 60.6% | 96.9%           | 95.1% | 49.6% | 55.1% |
| <b>GY1508.09</b>  | 10.7%            | 22.1% | 13.5%           | 11.0% | 40.2% | 28.8% |
| <b>GY1508.10</b>  | 93.6%            | 86.5% | 96.6%           | 98.2% | 94.4% | 92.1% |
| <b>GY1508.11</b>  | 82.9%            | 48.0% | 92.6%           | 94.8% | 29.3% | 32.3% |
| <b>EOC.TIL.27</b> | 99.3%            | 83.2% | 97.1%           | 97.5% | 26.4% | 28.8% |
| <b>GY1721.01</b>  | 54.0%            | 62.4% | 74.3%           | 76.2% | 62.9% | 63.1% |
| <b>GY1721.02</b>  | 86.1%            | 55.8% | 77.5%           | 92.5% | 96.9% | 96.8% |
| <b>GY1721.03</b>  | 26.0%            | 44.7% | 25.9%           | 28.3% | 50.8% | 49.1% |
| <b>GY1721.04</b>  | 84.9%            | 95.2% | 66.7%           | 69.6% | 95.9% | 94.7% |
| <b>GY1721.05</b>  | 55.7%            | 45.9% | 33.5%           | 37.5% | 55.3% | 54.6% |
| <b>GY1721.07</b>  | 25.5%            | 96.2% | 96.4%           | 96.6% | 96.3% | 98.5% |

**Supplementary Table S3. Flow cytometry antibodies used for phenotyping.**

| <b>Antigen</b> | <b>Fluorochrome</b> | <b>Clone</b> | <b>Manufacturer</b> | <b>Catalog No.</b> |
|----------------|---------------------|--------------|---------------------|--------------------|
| <b>BTLA</b>    | PE                  | J168-50      | BD Biosciences      | 558485             |
| <b>CCR7</b>    | PE-Cy7              | 3D12         | BD Biosciences      | 557648             |
| <b>CD3</b>     | BV510               | SK7          | BD Biosciences      | 740202             |
| <b>CD4</b>     | PerCP               | SK3          | BD Biosciences      | 345770             |
| <b>CD8</b>     | BV421               | RPA-T8       | BD Biosciences      | 562428             |
| <b>CD16</b>    | FITC                | DJ130c       | Dako                | F7011              |
| <b>CD27</b>    | PE                  | L128         | BD Biosciences      | 340425             |
| <b>CD28</b>    | APC                 | CD28.2       | BD Biosciences      | 559770             |
| <b>CD45RA</b>  | FITC                | L48          | BD Biosciences      | 335039             |
| <b>CD56</b>    | PE-Cy7              | B159         | BD Biosciences      | 557747             |
| <b>CD57</b>    | FITC                | NK-1         | BD Biosciences      | 555619             |
| <b>CD62L</b>   | APC                 | DREG-56      | BD Biosciences      | 559772             |
| <b>CD69</b>    | PE-Cy7              | FN50         | BD Biosciences      | 557745             |
| <b>CD137</b>   | PE                  | 4B4-1        | BD Biosciences      | 555956             |
| <b>CTLA-4</b>  | APC                 | L3D10        | BioLegend           | 349908             |
| <b>ICOS</b>    | PE                  | DX29         | BD Biosciences      | 557802             |
| <b>LAG-3</b>   | FITC                | 17B4         | LS Bioscience       | LS-B2237           |
| <b>PD-1</b>    | PE-Cy7              | EH12.1       | BD Biosciences      | 561272             |
| <b>TIM-3</b>   | APC                 | F38-2E2      | eBioscience         | 17-3109-42         |

**Supplementary Table S4. Flow cytometry antibodies used for intracellular cytokine staining.**

| <b>Antigen</b>                 | <b>Fluorochrome</b> | <b>Clone</b> | <b>Manufacturer</b> | <b>Catalog No.</b> |
|--------------------------------|---------------------|--------------|---------------------|--------------------|
| <b>CD3</b>                     | FITC                | SK7          | BD Biosciences      | 345763             |
| <b>CD4</b>                     | PerCP               | OKT4         | BioLegend           | 317432             |
| <b>CD8</b>                     | QDot605             | 3B5          | Invitrogen          | Q10009             |
| <b>CD56</b>                    | PE                  | NCAM16.2     | BD Biosciences      | 345812             |
| <b>CD107a</b>                  | BV421               | H4A3         | BD Biosciences      | 562623             |
| <b>IFN-<math>\gamma</math></b> | PE-Cy7              | B27          | BD Biosciences      | 557643             |
| <b>TNF</b>                     | APC                 | Mab11        | BD Biosciences      | 554514             |

## Supplementary Figure S1

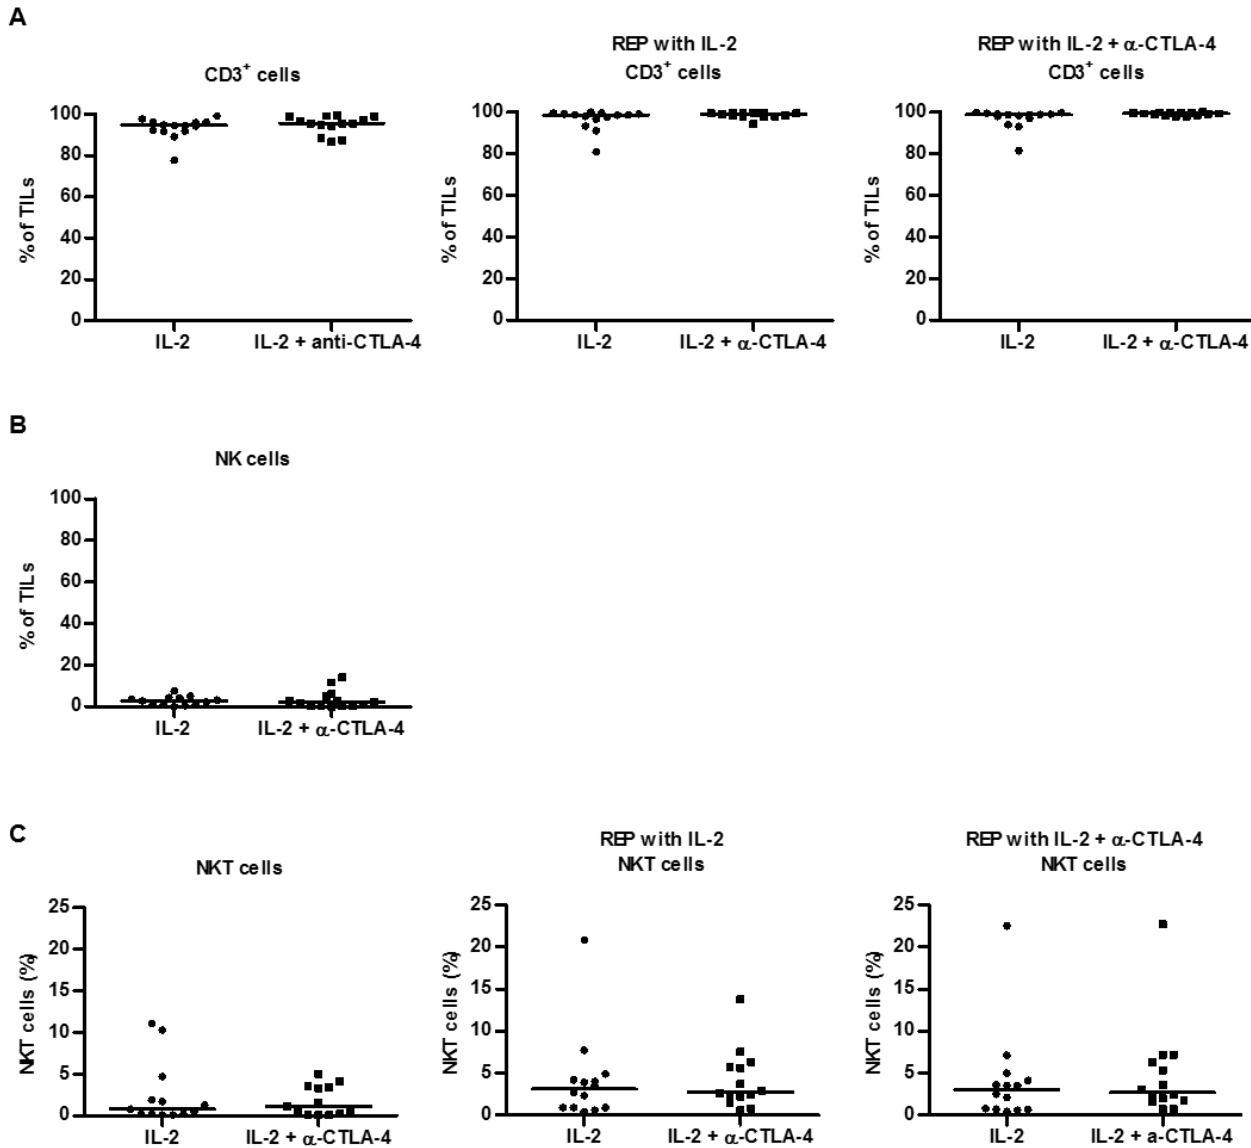

### Supplementary Figure S1. CD3<sup>+</sup>T and NK cells.

(A) Scatterplots showing the proportion of CD3<sup>+</sup> cells in initial TIL cultures, TILs expanded in high-dose IL-2 only and TILs expanded in high-dose IL-2 and anti-CTLA-4. The legend indicates the culture conditions during the initial TIL expansion. Data are presented with median.

**(B)** Scatterplot showing the proportion of NK cells ( $CD3^{-}CD56^{+}$ ) in initial TIL. Data are presented with median.

**(C)** Scatterplots showing the proportion of NKT cells ( $CD3^{+}CD56^{+}$ ) in initial TIL cultures, TILs expanded in high-dose IL-2 only and TILs expanded in high-dose IL-2 and anti-CTLA-4. The legend indicates the culture conditions during the initial TIL expansion. Data are presented with median.

Supplementary Figure S2

A

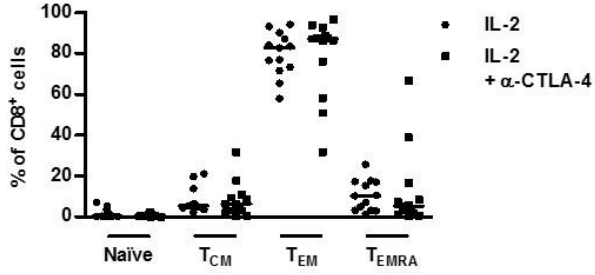

B

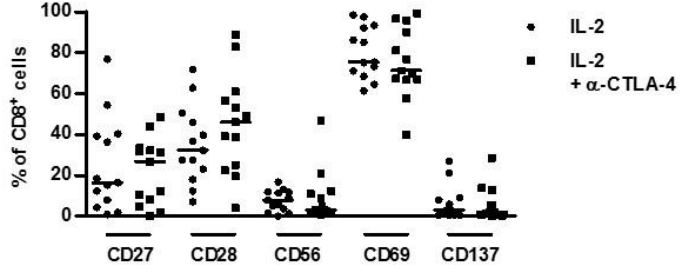

C

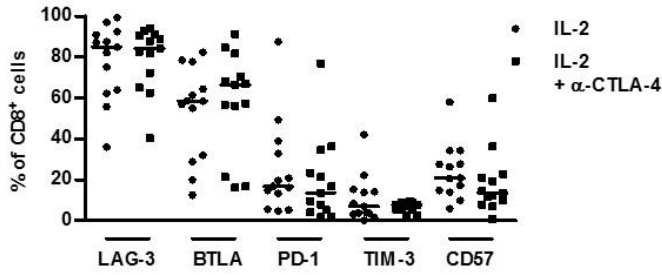

D

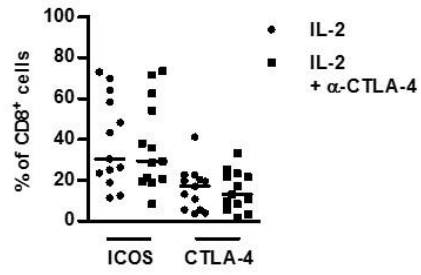

E

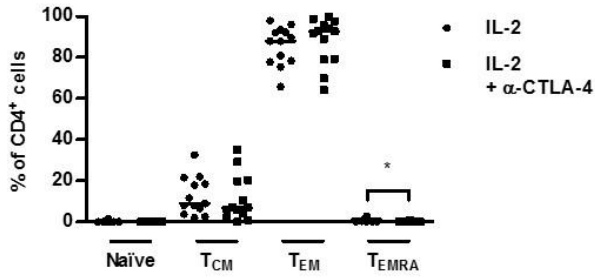

F

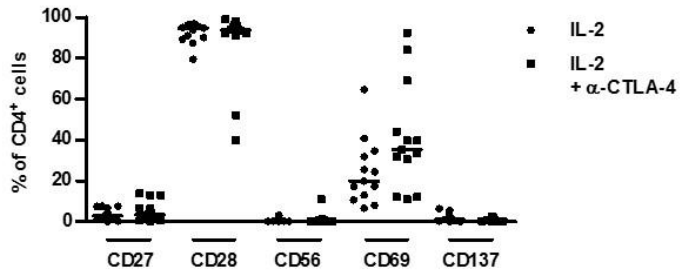

G

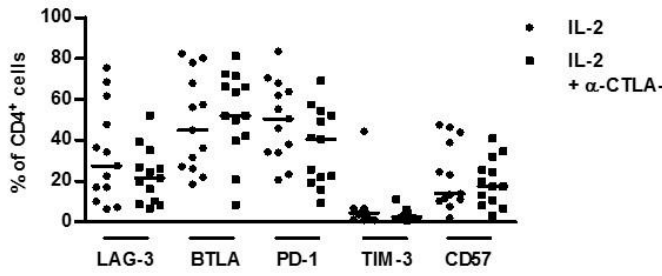

H

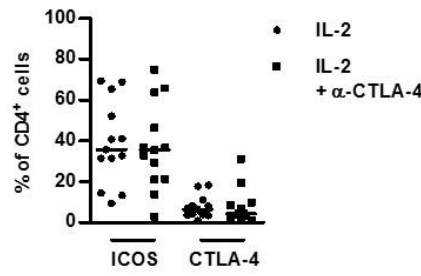

**Supplementary Figure S2. Phenotype of initial TILs.**

(**A and E**) Scatterplot showing the percentages of naïve ( $T_N$ ), central memory ( $T_{CM}$ ), effector memory ( $T_{EM}$ ) and  $T_{EMRA}$ , (**B and F**) scatterplot showing the percentages of  $CD27^+$ ,  $CD28^+$ ,  $CD56^+$ ,  $CD69^+$  and  $CD137^+$  cells, (**C and G**) scatterplot showing the percentages of  $LAG-3^+$ ,  $BTLA^+$ ,  $PD-1^+$ ,  $TIM-3^+$  and  $CD57^+$  cells and (**D and H**) scatterplot showing percentages of  $ICOS^+$  and  $CTLA-4^+$  cells in (**A-D**) the  $CD8^+$  T-cell population and in (**E-H**) the  $CD4^+$  T-cell population in initial TIL culture supplemented with anti-CTLA-4 antibody and non-supplemented initial TILs (n=13). The legend indicates the culture conditions during the initial TIL expansion.  $T_N$ ,  $T_{CM}$ ,  $T_{EM}$  and  $T_{EMRA}$  cells were defined as  $CD45RA^+ CD62L^+$ ,  $CD45RA^- CD62L^+$ ,  $CD45RA^- CD62L^-$  and  $CD45RA^+ CD62L^-$ , respectively. Data are presented with median.

The different conditions were compared using Wilcoxon signed rank test. Statistically significant differences are indicated with \*, \*\* or \*\*\* for p-values less than 0.05, 0.01 or 0.001, respectively.

Supplementary Figure S3

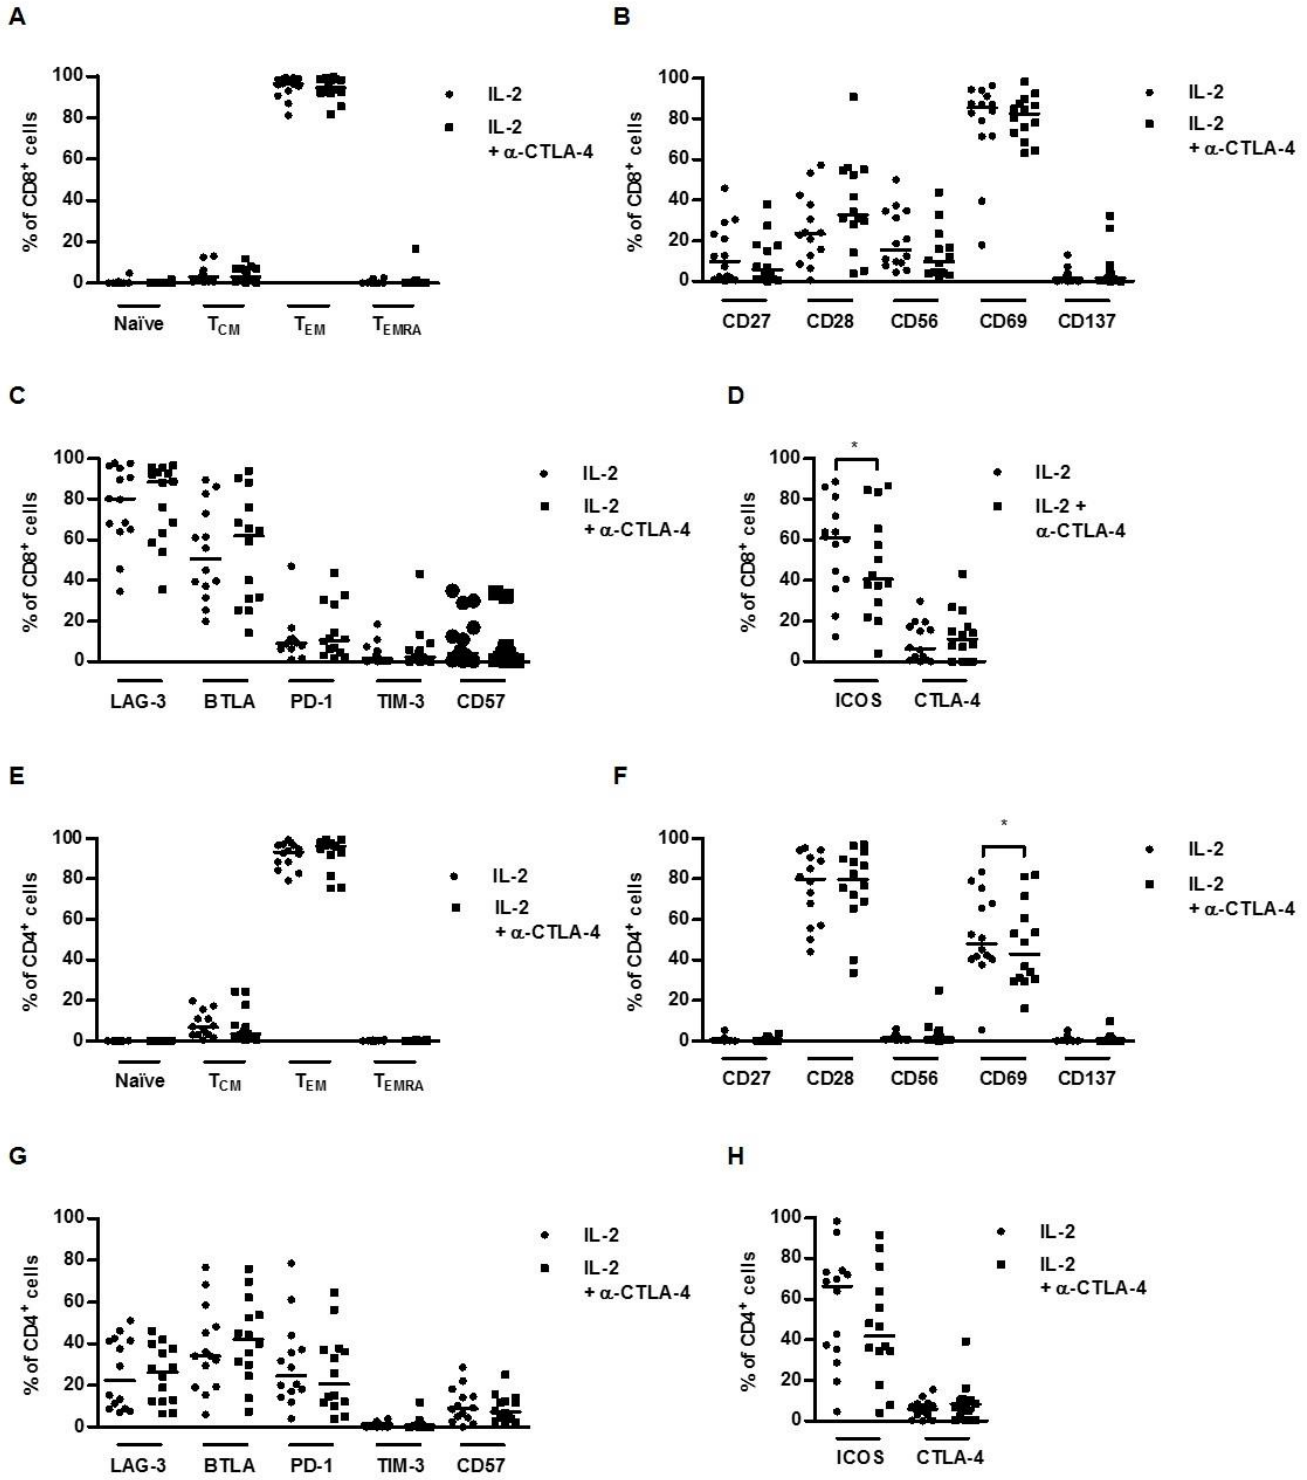



### **Supplementary Figure S3. Phenotype of expanded TILs.**

**(A and E)** Scatterplot showing the percentages of naïve ( $T_N$ ), central memory ( $T_{CM}$ ), effector memory ( $T_{EM}$ ) and  $T_{EMRA}$ , **(B and F)** scatterplot showing the percentages of  $CD27^+$ ,  $CD28^+$ ,  $CD56^+$ ,  $CD69^+$  and  $CD137^+$  cells, **(C and G)** scatterplot showing the percentages of exhaustion markers LAG-3, BTLA, PD-1, TIM-3 and CD57 and **(D and H)** scatterplot showing percentages of  $ICOS^+$  and  $CTLA^+$  cells in **(A-D)** the  $CD8^+$  T-cell population and in **(E-H)** the  $CD4^+$  T-cell population in TILs expanded in high-dose IL-2. The legend indicates the culture conditions during the initial TIL expansion.  $T_N$ ,  $T_{CM}$ ,  $T_{EM}$  and  $T_{EMRA}$  cells were defined as  $CD45RA^+ CD62L^+$ ,  $CD45RA^- CD62L^+$ ,  $CD45RA^- CD62L^-$  and  $CD45RA^+ CD62L^-$ , respectively. Data are presented with median.

The different conditions were compared using Wilcoxon signed rank test. Statistically significant differences are indicated with \*, \*\* or \*\*\* for p-values less than 0.05, 0.01 or 0.001, respectively.

# Supplementary Figure S4

**A**

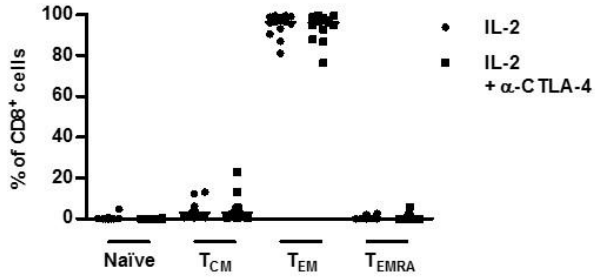

**B**

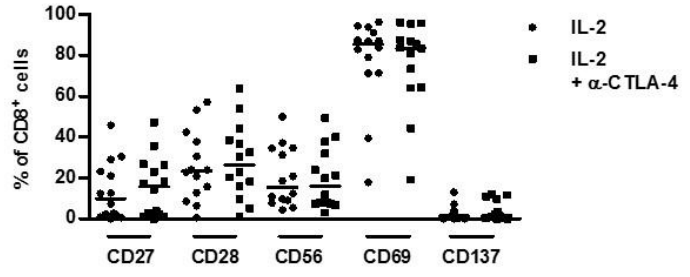

**C**

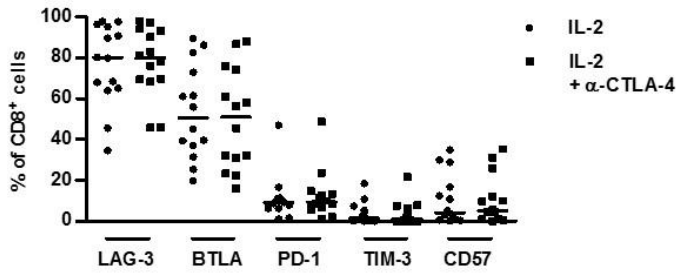

**D**

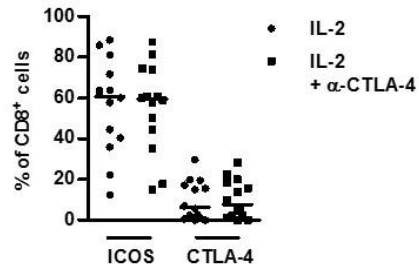

**E**

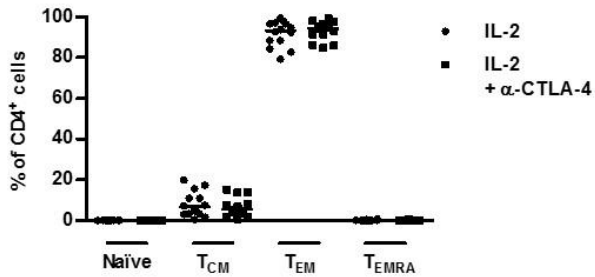

**F**

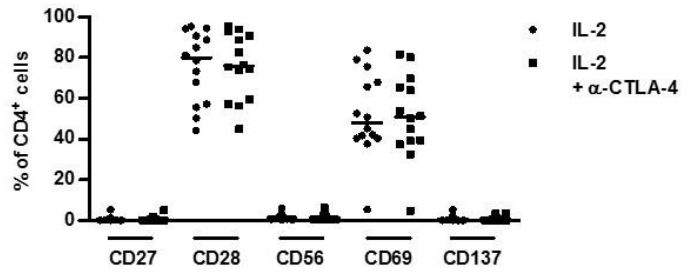

**G**

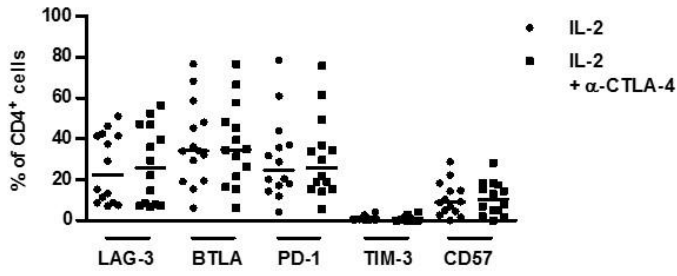

**H**

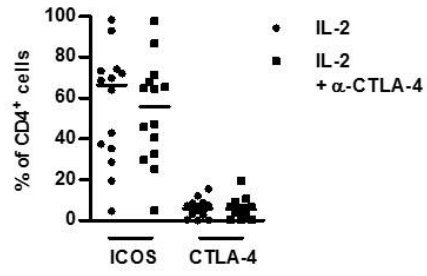

**Supplementary Figure S4. Phenotype of TILs expanded from TILs not supplemented with anti-CTLA-4 antibody.**

(**A and E**) Scatterplot showing the percentages of naïve ( $T_N$ ), central memory ( $T_{CM}$ ), effector memory ( $T_{EM}$ ) and  $T_{EMRA}$ , (**B and F**) scatterplot showing the percentages of  $CD27^+$ ,  $CD28^+$ ,  $CD56^+$ ,  $CD69^+$  and  $CD137^+$  cells, (**C and G**) scatterplot showing the percentages of exhaustion markers LAG-3, BTLA, PD-1, TIM-3 and CD57 and (**D and H**) scatterplot showing percentages of  $ICOS^+$  and  $CTLA^+$  cells in (**A-D**) the  $CD8^+$  T-cell population and in (**E-H**) the  $CD4^+$  T-cell population in TILs expanded from initial TILs not supplemented with anti-CTLA-4. The legend indicates the culture conditions during the rapid TIL expansion. Data are presented with median.

Supplementary Figure S5

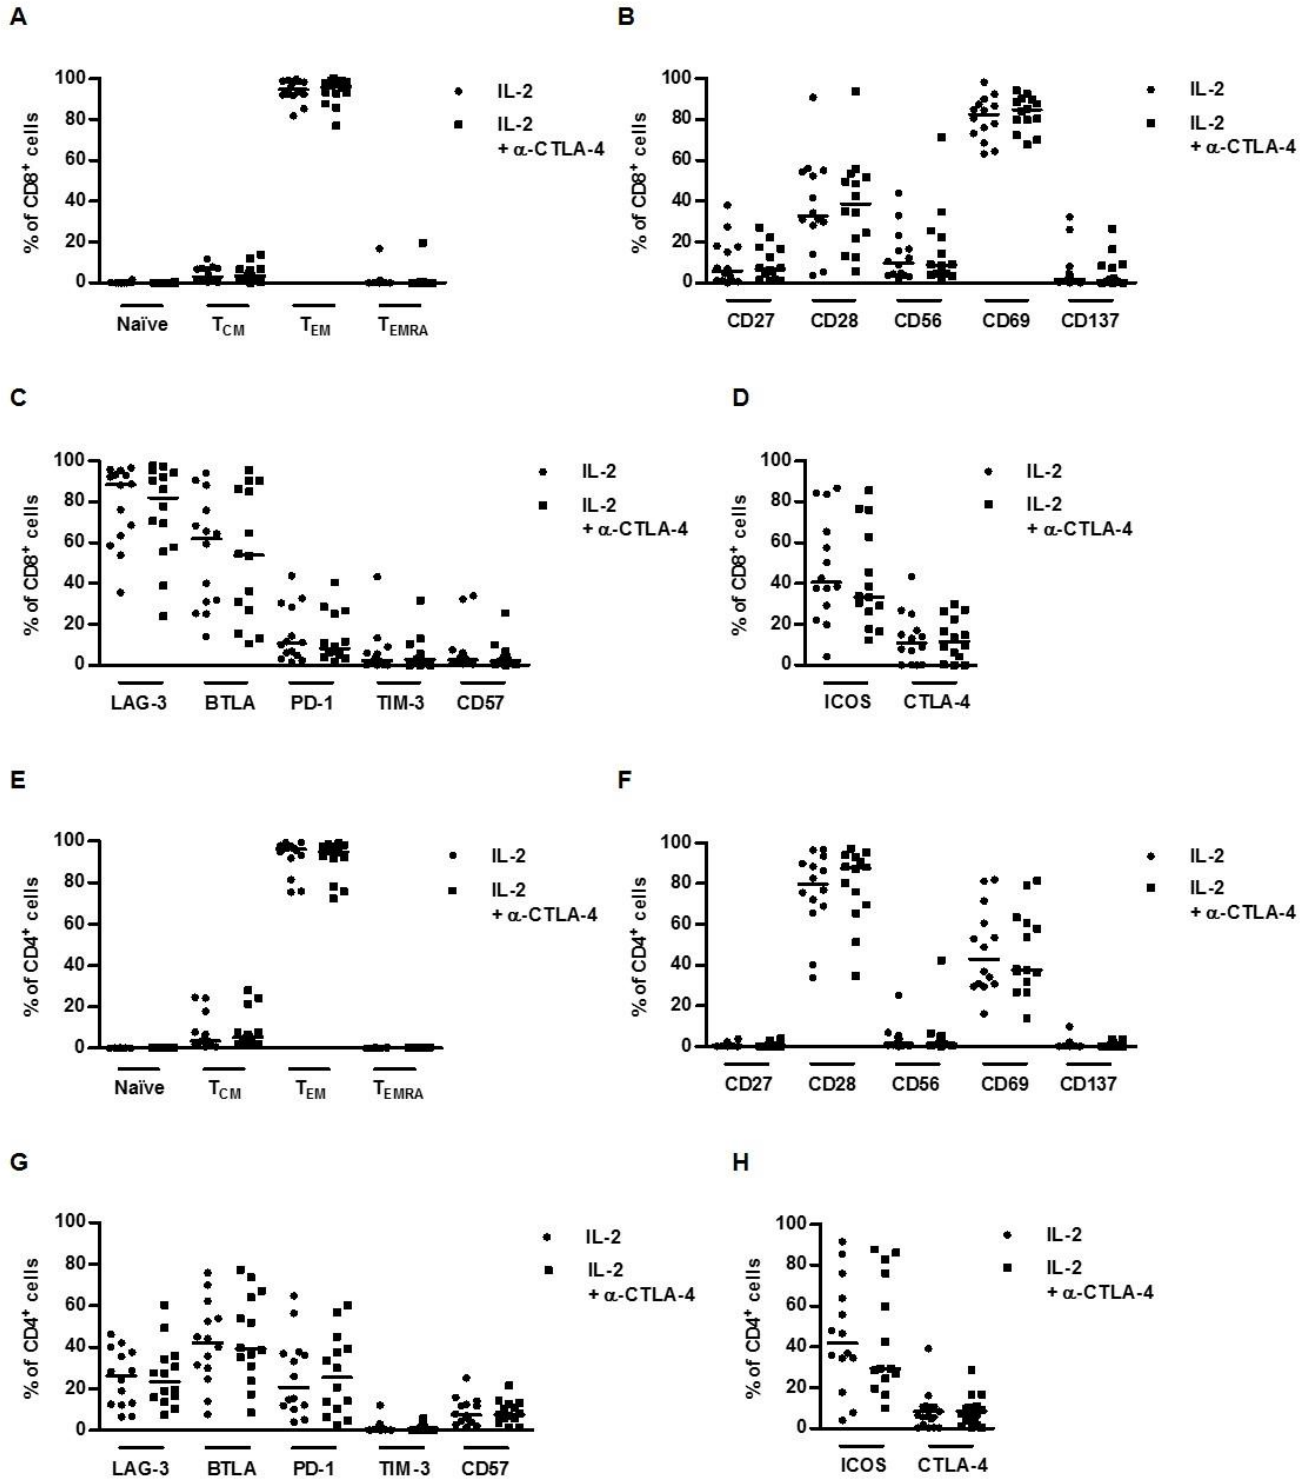

**Supplementary Figure S5. Phenotype of TILs expanded from TILs supplemented with anti-CTLA-4 antibody.**

(**A and E**) Scatterplot showing the percentages of naïve ( $T_N$ ), central memory ( $T_{CM}$ ), effector memory ( $T_{EM}$ ) and  $T_{EMRA}$ , (**B and F**) scatterplot showing the percentages of  $CD27^+$ ,  $CD28^+$ ,  $CD56^+$ ,  $CD69^+$  and  $CD137^+$  cells, (**C and G**) scatterplot showing the percentages of  $LAG-3^+$ ,  $BTLA^+$ ,  $PD-1^+$ ,  $TIM-3^+$  and  $CD57^+$  cells and (**D and H**) scatterplot showing percentages of  $ICOS^+$  and  $CTLA-4^+$  cells in (**A-D**) the  $CD8^+$  T-cell population and in (**E-H**) the  $CD4^+$  T-cell population in TILs expanded from initial TILs supplemented with anti-CTLA-4. The legend indicates the culture conditions during the rapid TIL expansion. Data are presented with median.

## Supplementary Figure S6

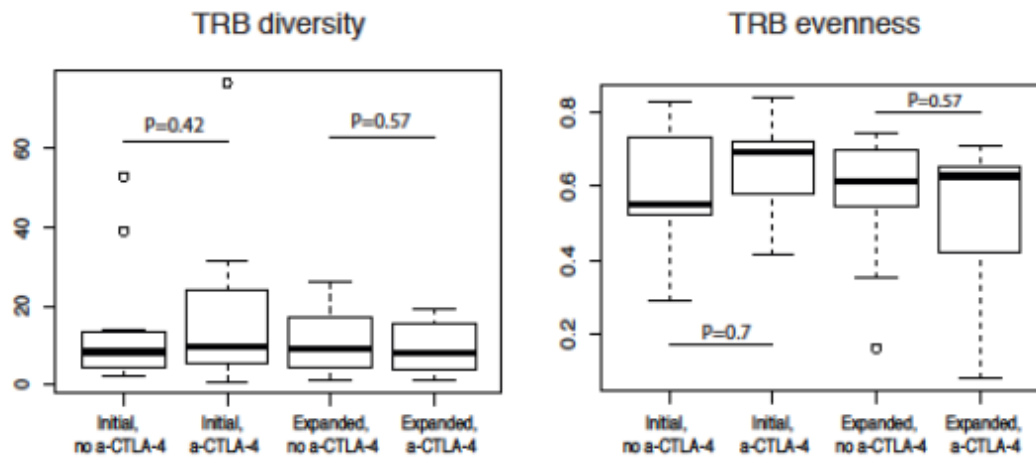

### Supplementary Figure S6. TRB diversity parameters of initial and expanded TILs.

TRB diversity (left) and evenness (right) in the initial and expanded cultures with and without anti-CTLA-4 antibody, as derived by TCR repertoire analysis.

Supplementary Figure S7

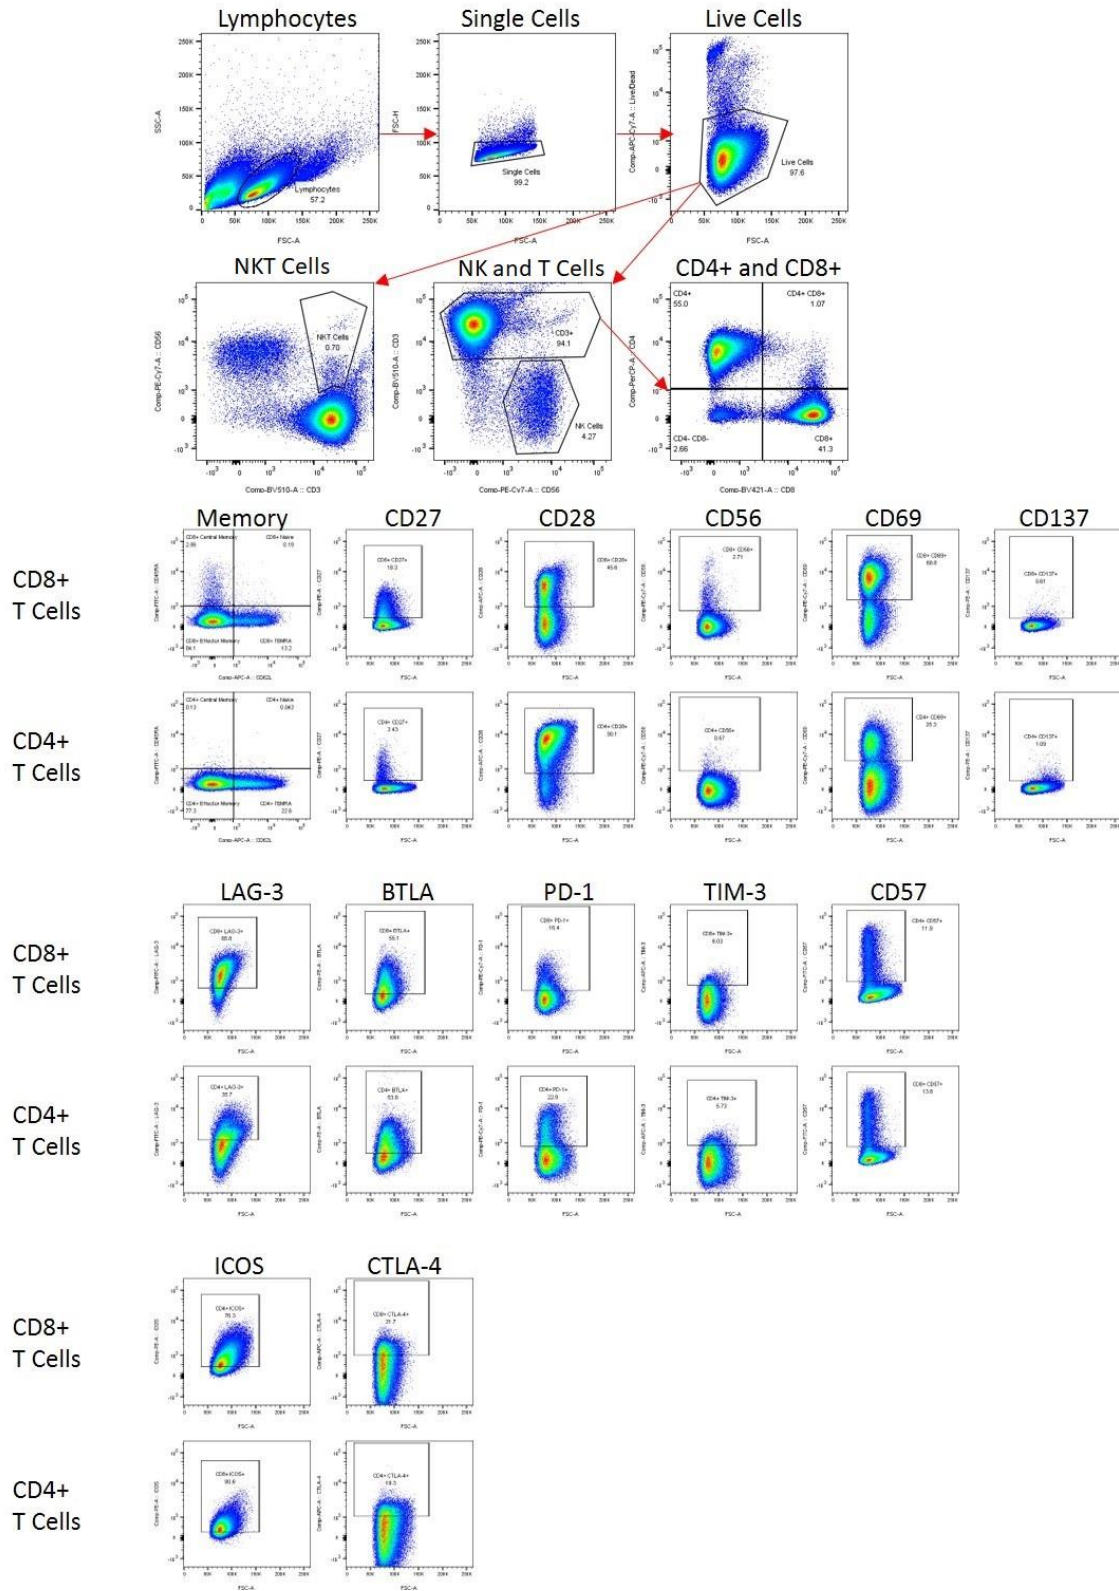

**Supplementary Figure S7. Gating Strategy of the phenotyping of TILs.**

FACS plots illustrating the gating strategy used for the phenotype analysis of both initial and expanded TIL cultures. The FACS data from the unsupplemented initial TIL culture from patient GY1721.05 are shown. Lymphocytes, single cells, live cells, CD3<sup>+</sup>, NK and NKT cells were gated consecutively. Subsequently, CD4<sup>+</sup> and CD8<sup>+</sup> cells within the CD3<sup>+</sup> cells and cells expressing activation and exhaustion markers were gated separately in the CD4<sup>+</sup> and CD8<sup>+</sup> cell populations.



## Supplementary Figure S8

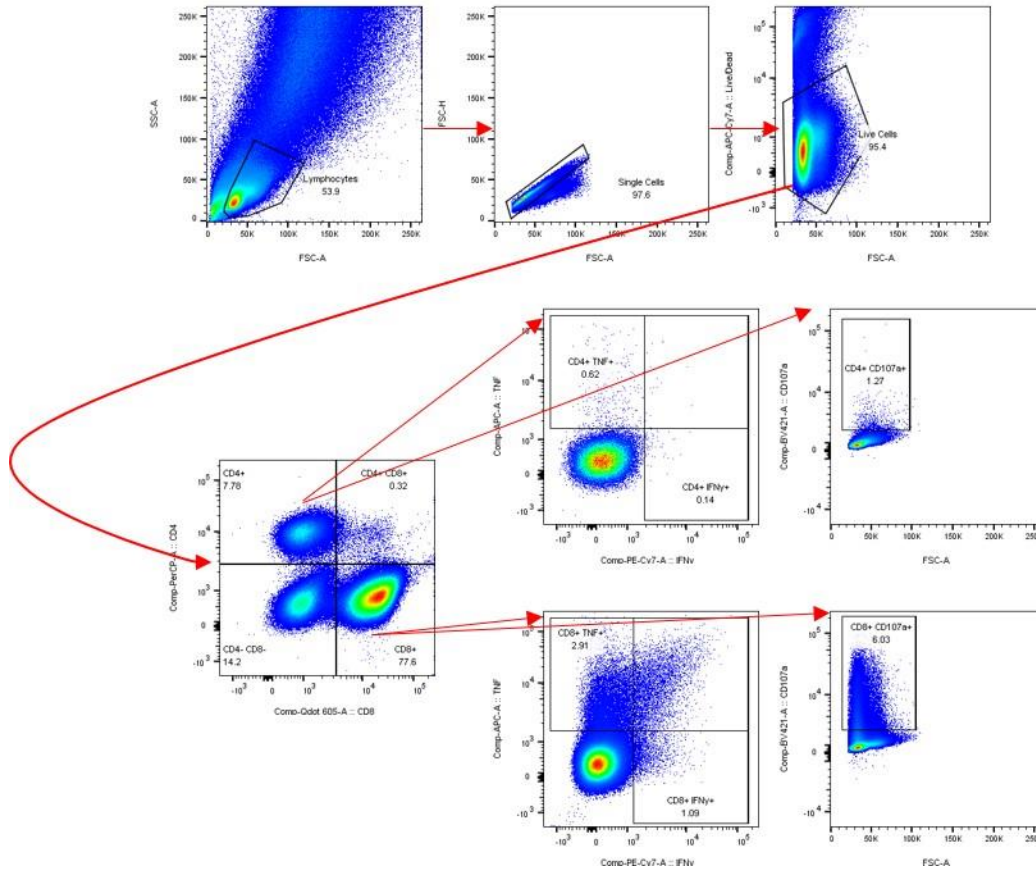

### Supplementary Figure S8. Gating strategy of the tumor reactivity analysis of TILs.

FACS plots illustrating the gating strategy used for the functionality analysis of both initial and expanded TIL cultures after co-culture with autologous tumor cell lines. The FACS data from the TIL culture expanded from the initial TIL culture supplemented with anti-CTLA-4 antibody from patient GY1508.06 are shown. Lymphocytes, single cells, live cells and CD4<sup>+</sup> and CD8<sup>+</sup> cells were gated. Subsequently, cells secreting the cytokines TNF and IFN $\gamma$  (left panels) or expressing CD107a (right panels) in CD4<sup>+</sup> cells (upper panels) and CD8<sup>+</sup> cells (lower panels) were gated.
